# Supplementary material
Source: publisher figshare collection journal article supplement (https://gsapubs.figshare.com/ndownloader/files/22397973)
Supplement: Supplementary file 1 [file 22397973]

| SUPPLEMENTAL TABLE 1. DATA USED IN FREQUENCY ANALYSIS | | |
| --- | --- | --- |
|  | | |
| Stratigraphic level (m) | Absolute age (Ma) | Depositional environment code |
| 251.41 | 5.23 | 2 |
| 251.91 | 5.226433 | 2 |
| 252.21 | 5.224292 | 3 |
| 252.41 | 5.222865 | 3 |
| 252.91 | 5.219298 | 3 |
| 253.06 | 5.218228 | 4 |
| 253.41 | 5.215731 | 4 |
| 253.91 | 5.212163 | 4 |
| 254.41 | 5.208596 | 4 |
| 254.51 | 5.207882 | 2 |
| 254.91 | 5.205029 | 2 |
| 255.41 | 5.201461 | 2 |
| 255.91 | 5.197894 | 2 |
| 256.41 | 5.194326 | 2 |
| 256.91 | 5.190759 | 3 |
| 257.41 | 5.187192 | 3 |
| 257.91 | 5.183624 | 3 |
| 258.41 | 5.180057 | 3 |
| 258.91 | 5.17649 | 3 |
| 259.41 | 5.172922 | 3 |
| 259.91 | 5.169355 | 3 |
| 260.06 | 5.168285 | 2 |
| 260.41 | 5.165788 | 2 |
| 260.91 | 5.16222 | 2 |
| 261.41 | 5.158653 | 2 |
| 261.91 | 5.155086 | 2 |
| 262.41 | 5.151518 | 2 |
| 262.76 | 5.149021 | 2 |
| 262.91 | 5.147951 | 4 |
| 263.41 | 5.144384 | 4 |
| 263.91 | 5.140816 | 4 |
| 264.41 | 5.137249 | 4 |
| 264.91 | 5.133682 | 4 |
| 265.41 | 5.130114 | 4 |
| 265.91 | 5.126547 | 4 |
| 266.21 | 5.124406 | 3 |
| 266.41 | 5.122979 | 3 |
| 266.91 | 5.119412 | 3 |
| 267.41 | 5.115845 | 3 |
| 267.51 | 5.115131 | 4 |
| 267.91 | 5.112277 | 4 |
| 268.41 | 5.10871 | 4 |
| 268.56 | 5.10764 | 3 |
| 268.91 | 5.105143 | 3 |
| 269.01 | 5.104429 | 1 |
| 269.41 | 5.101575 | 1 |
| 269.91 | 5.098008 | 1 |
| 270.41 | 5.094441 | 1 |
| 270.91 | 5.090873 | 1 |
| 271.41 | 5.087306 | 1 |
| 271.91 | 5.083739 | 1 |
| 272.41 | 5.080171 | 1 |
| 272.91 | 5.076604 | 1 |
| 273.41 | 5.073037 | 1 |
| 273.91 | 5.069469 | 1 |
| 274.41 | 5.065902 | 1 |
| 274.56 | 5.064832 | 2 |
| 274.91 | 5.062334 | 2 |
| 275.41 | 5.058767 | 2 |
| 275.91 | 5.0552 | 2 |
| 276.41 | 5.051632 | 2 |
| 276.91 | 5.048065 | 2 |
| 277.16 | 5.046281 | 3 |
| 277.41 | 5.044498 | 3 |
| 277.91 | 5.04093 | 3 |
| 278.41 | 5.037363 | 3 |
| 278.91 | 5.033796 | 3 |
| 279.41 | 5.030228 | 3 |
| 279.91 | 5.026661 | 3 |
| 280.41 | 5.023094 | 3 |
| 280.56 | 5.022023 | 2 |
| 280.91 | 5.019526 | 2 |
| 281.41 | 5.015959 | 2 |
| 281.91 | 5.012392 | 2 |
| 282.41 | 5.008824 | 2 |
| 282.76 | 5.006327 | 3 |
| 282.91 | 5.005257 | 3 |
| 283.41 | 5.001689 | 3 |
| 283.91 | 4.998122 | 3 |
| 284.41 | 4.994555 | 3 |
| 284.91 | 4.990987 | 3 |
| 285.41 | 4.98742 | 3 |
| 285.91 | 4.983853 | 3 |
| 286.31 | 4.980999 | 4 |
| 286.41 | 4.980285 | 4 |
| 286.91 | 4.976718 | 4 |
| 287.21 | 4.974578 | 3 |
| 287.41 | 4.973151 | 3 |
| 287.91 | 4.969583 | 3 |
| 288.01 | 4.96887 | 1 |
| 288.41 | 4.966016 | 1 |
| 288.91 | 4.962449 | 1 |
| 289.41 | 4.958881 | 1 |
| 289.91 | 4.955314 | 1 |
| 290.41 | 4.951747 | 1 |
| 290.91 | 4.948179 | 1 |
| 291.41 | 4.944612 | 3 |
| 291.91 | 4.941045 | 5 |
| 292.41 | 4.937477 | 5 |
| 292.91 | 4.93391 | 5 |
| 293.41 | 4.930342 | 5 |
| 293.91 | 4.926775 | 5 |
| 294.41 | 4.923208 | 5 |
| 294.91 | 4.91964 | 5 |
| 295.41 | 4.916073 | 5 |
| 295.91 | 4.912506 | 5 |
| 296.41 | 4.908938 | 5 |
| 296.91 | 4.905371 | 3 |
| 297.06 | 4.904301 | 3 |
| 297.41 | 4.901804 | 1 |
| 297.91 | 4.898236 | 1 |
| 298.41 | 4.894669 | 1 |
| 298.91 | 4.891102 | 1 |
| 299.41 | 4.887534 | 1 |
| 299.91 | 4.883967 | 1 |
| 300.41 | 4.8804 | 1 |
| 300.91 | 4.876832 | 1 |
| 301.41 | 4.873265 | 1 |
| 301.81 | 4.870411 | 3 |
| 301.91 | 4.869697 | 3 |
| 302.41 | 4.86613 | 3 |
| 302.56 | 4.86506 | 4 |
| 302.91 | 4.862563 | 4 |
| 303.41 | 4.858995 | 4 |
| 303.91 | 4.855428 | 4 |
| 304.41 | 4.851861 | 4 |
| 304.91 | 4.848293 | 4 |
| 305.41 | 4.844726 | 4 |
| 305.66 | 4.842942 | 3 |
| 305.91 | 4.841159 | 3 |
| 306.41 | 4.837591 | 3 |
| 306.66 | 4.835808 | 4 |
| 306.91 | 4.834024 | 4 |
| 307.21 | 4.831884 | 1 |
| 307.41 | 4.830457 | 1 |
| 307.91 | 4.826889 | 1 |
| 308.41 | 4.823322 | 1 |
| 308.91 | 4.819755 | 1 |
| 309.41 | 4.816187 | 1 |
| 309.91 | 4.81262 | 1 |
| 310.41 | 4.809053 | 1 |
| 310.91 | 4.805485 | 1 |
| 311.41 | 4.801918 | 1 |
| 311.91 | 4.79835 | 1 |
| 312.16 | 4.796567 | 3 |
| 312.41 | 4.794783 | 3 |
| 312.91 | 4.791216 | 3 |
| 313.41 | 4.787648 | 3 |
| 313.91 | 4.784081 | 3 |
| 314.41 | 4.780514 | 3 |
| 314.91 | 4.776946 | 3 |
| 314.96 | 4.77659 | 4 |
| 315.41 | 4.773379 | 4 |
| 315.91 | 4.769812 | 4 |
| 316.41 | 4.766244 | 4 |
| 316.91 | 4.762677 | 4 |
| 317.41 | 4.75911 | 4 |
| 317.81 | 4.756256 | 5 |
| 317.91 | 4.755542 | 5 |
| 318.41 | 4.751975 | 5 |
| 318.91 | 4.748408 | 5 |
| 319.41 | 4.74484 | 5 |
| 319.91 | 4.741273 | 5 |
| 320.41 | 4.737705 | 5 |
| 320.91 | 4.734138 | 5 |
| 321.16 | 4.732354 | 4 |
| 321.41 | 4.730571 | 4 |
| 321.91 | 4.727003 | 4 |
| 322.06 | 4.725933 | 3 |
| 322.36 | 4.723793 | 1 |
| 322.41 | 4.723436 | 1 |
| 322.91 | 4.719869 | 1 |
| 323.41 | 4.716301 | 1 |
| 323.91 | 4.712734 | 1 |
| 324.41 | 4.709167 | 1 |
| 324.91 | 4.705599 | 1 |
| 325.41 | 4.702032 | 1 |
| 325.91 | 4.698465 | 1 |
| 326.41 | 4.694897 | 1 |
| 326.91 | 4.69133 | 1 |
| 327.41 | 4.687763 | 1 |
| 327.91 | 4.684195 | 1 |
| 328.41 | 4.680628 | 1 |
| 328.76 | 4.678131 | 4 |
| 328.91 | 4.677061 | 4 |
| 329.41 | 4.673493 | 4 |
| 329.76 | 4.670996 | 5 |
| 329.91 | 4.669926 | 5 |
| 330.41 | 4.666358 | 5 |
| 330.91 | 4.662791 | 5 |
| 331.01 | 4.662078 | 3 |
| 331.41 | 4.659224 | 3 |
| 331.91 | 4.655656 | 3 |
| 332.41 | 4.652089 | 3 |
| 332.91 | 4.648522 | 3 |
| 333.21 | 4.646381 | 1 |
| 333.41 | 4.644954 | 1 |
| 333.91 | 4.641387 | 1 |
| 334.41 | 4.63782 | 1 |
| 334.91 | 4.634252 | 1 |
| 335.41 | 4.630685 | 1 |
| 335.91 | 4.627118 | 1 |
| 336.41 | 4.62355 | 1 |
| 336.91 | 4.619983 | 1 |
| 337.41 | 4.616416 | 1 |
| 337.51 | 4.615702 | 3 |
| 337.91 | 4.612848 | 3 |
| 338.41 | 4.609281 | 3 |
| 338.91 | 4.605713 | 3 |
| 339.41 | 4.602146 | 3 |
| 339.91 | 4.598579 | 3 |
| 340.41 | 4.595011 | 3 |
| 340.91 | 4.591444 | 3 |
| 341.06 | 4.590374 | 5 |
| 341.41 | 4.587877 | 5 |
| 341.91 | 4.584309 | 5 |
| 342.41 | 4.580742 | 5 |
| 342.91 | 4.577175 | 5 |
| 343.41 | 4.573607 | 5 |
| 343.91 | 4.57004 | 5 |
| 344.41 | 4.566473 | 5 |
| 344.91 | 4.562905 | 5 |
| 345.41 | 4.559338 | 5 |
| 345.91 | 4.555771 | 5 |
| 346.41 | 4.552203 | 5 |
| 346.91 | 4.548636 | 5 |
| 347.41 | 4.545068 | 5 |
| 347.91 | 4.541501 | 5 |
| 348.41 | 4.537934 | 5 |
| 348.91 | 4.534366 | 5 |
| 349.16 | 4.532583 | 4 |
| 349.41 | 4.530799 | 4 |
| 349.91 | 4.527232 | 4 |
| 350.01 | 4.526518 | 5 |
| 350.41 | 4.523664 | 5 |
| 350.91 | 4.520097 | 5 |
| 351.41 | 4.51653 | 5 |
| 351.91 | 4.512962 | 5 |
| 352.41 | 4.509395 | 5 |
| 352.91 | 4.505828 | 5 |
| 353.41 | 4.50226 | 5 |
| 353.86 | 4.49905 | 3 |
| 353.91 | 4.498693 | 3 |
| 354.41 | 4.495126 | 3 |
| 354.76 | 4.492628 | 5 |
| 354.91 | 4.491558 | 5 |
| 355.41 | 4.487991 | 5 |
| 355.91 | 4.484424 | 5 |
| 356.41 | 4.480856 | 5 |
| 356.91 | 4.477289 | 5 |
| 357.41 | 4.473721 | 5 |
| 357.91 | 4.470154 | 5 |
| 357.96 | 4.469797 | 4 |
| 358.41 | 4.466587 | 4 |
| 358.91 | 4.463019 | 4 |
| 359.41 | 4.459452 | 4 |
| 359.76 | 4.456955 | 3 |
| 359.91 | 4.455885 | 3 |
| 360.41 | 4.452317 | 3 |
| 360.91 | 4.44875 | 3 |
| 361.41 | 4.445183 | 3 |
| 361.91 | 4.441615 | 3 |
| 362.41 | 4.438048 | 3 |
| 362.91 | 4.434481 | 3 |
| 363.41 | 4.430913 | 3 |
| 363.56 | 4.429843 | 5 |
| 363.91 | 4.427346 | 5 |
| 364.41 | 4.423779 | 5 |
| 364.91 | 4.420211 | 5 |
| 365.41 | 4.416644 | 5 |
| 365.91 | 4.413076 | 5 |
| 366.41 | 4.409509 | 5 |
| 366.91 | 4.405942 | 5 |
| 367.41 | 4.402374 | 5 |
| 367.91 | 4.398807 | 5 |
| 368.41 | 4.39524 | 5 |
| 368.91 | 4.391672 | 5 |
| 369.41 | 4.388105 | 5 |
| 369.91 | 4.384538 | 5 |
| 370.41 | 4.38097 | 5 |
| 370.91 | 4.377403 | 5 |
| 371.41 | 4.373836 | 5 |
| 371.91 | 4.370268 | 5 |
| 372.41 | 4.366701 | 5 |
| 372.76 | 4.364204 | 3 |
| 372.91 | 4.363134 | 1 |
| 373.41 | 4.359566 | 1 |
| 373.91 | 4.355999 | 1 |
| 374.41 | 4.352432 | 1 |
| 374.91 | 4.348864 | 1 |
| 375.41 | 4.345297 | 1 |
| 375.91 | 4.341729 | 1 |
| 376.41 | 4.338162 | 1 |
| 376.91 | 4.334595 | 1 |
| 377.41 | 4.331027 | 1 |
| 377.91 | 4.32746 | 1 |
| 378.11 | 4.326033 | 3 |
| 378.41 | 4.323893 | 3 |
| 378.91 | 4.320325 | 3 |
| 379.41 | 4.316758 | 3 |
| 379.91 | 4.313191 | 3 |
| 380.41 | 4.309623 | 3 |
| 380.91 | 4.306056 | 3 |
| 381.16 | 4.304272 | 4 |
| 381.41 | 4.302489 | 4 |
| 381.91 | 4.298921 | 4 |
| 382.41 | 4.295354 | 4 |
| 382.91 | 4.291787 | 4 |
| 383.41 | 4.288219 | 4 |
| 383.91 | 4.284652 | 4 |
| 384.41 | 4.281084 | 4 |
| 384.91 | 4.277517 | 4 |
| 385.41 | 4.27395 | 4 |
| 385.76 | 4.271453 | 1 |
| 385.91 | 4.270382 | 1 |
| 386.11 | 4.268955 | 4 |
| 386.41 | 4.266815 | 4 |
| 386.61 | 4.265388 | 1 |
| 386.91 | 4.263248 | 1 |
| 387.41 | 4.25968 | 2 |
| 387.91 | 4.256113 | 2 |
| 388.06 | 4.255043 | 3 |
| 388.41 | 4.252546 | 3 |
| 388.51 | 4.251832 | 4 |
| 388.91 | 4.248978 | 4 |
| 389.41 | 4.245411 | 4 |
| 389.51 | 4.244697 | 3 |
| 389.91 | 4.241844 | 3 |
| 390.01 | 4.24113 | 1 |
| 390.41 | 4.238276 | 1 |
| 390.91 | 4.234709 | 1 |
| 391.41 | 4.231142 | 1 |
| 391.91 | 4.227574 | 1 |
| 392.41 | 4.224007 | 1 |
| 392.91 | 4.220439 | 1 |
| 393.41 | 4.216872 | 1 |
| 393.76 | 4.214375 | 2 |
| 393.91 | 4.213305 | 2 |
| 394.41 | 4.209737 | 2 |
| 394.51 | 4.209024 | 4 |
| 394.91 | 4.20617 | 4 |
| 395.41 | 4.202603 | 4 |
| 395.91 | 4.199035 | 4 |
| 396.41 | 4.195468 | 4 |
| 396.91 | 4.191901 | 4 |
| 397.41 | 4.188333 | 4 |
| 397.91 | 4.184766 | 4 |
| 398.41 | 4.181199 | 4 |
| 398.46 | 4.180842 | 1 |
| 398.71 | 4.179058 | 2 |
| 398.91 | 4.177631 | 2 |
| 399.41 | 4.174064 | 2 |
| 399.71 | 4.171924 | 3 |
| 399.91 | 4.170497 | 3 |
| 400.41 | 4.166929 | 3 |
| 400.91 | 4.163362 | 3 |
| 400.96 | 4.163005 | 5 |
| 401.41 | 4.159795 | 5 |
| 401.91 | 4.156227 | 5 |
| 402.41 | 4.15266 | 5 |
| 402.91 | 4.149092 | 5 |
| 403.41 | 4.145525 | 5 |
| 403.91 | 4.141958 | 5 |
| 404.41 | 4.13839 | 5 |
| 404.91 | 4.134823 | 5 |
| 405.41 | 4.131256 | 5 |
| 405.91 | 4.127688 | 5 |
| 406.41 | 4.124121 | 5 |
| 406.46 | 4.123764 | 3 |
| 406.91 | 4.120554 | 3 |
| 407.36 | 4.117343 | 3 |
| 407.41 | 4.116986 | 5 |
| 407.91 | 4.113419 | 5 |
| 408.21 | 4.111279 | 2 |
| 408.41 | 4.109852 | 2 |
| 408.91 | 4.106284 | 2 |
| 409.41 | 4.102717 | 5 |
| 409.76 | 4.10022 | 3 |
| 409.91 | 4.09915 | 2 |
| 410.41 | 4.095582 | 2 |
| 410.91 | 4.092015 | 2 |
| 411.11 | 4.090588 | 3 |
| 411.41 | 4.088447 | 3 |
| 411.91 | 4.08488 | 3 |
| 412.41 | 4.081313 | 3 |
| 412.91 | 4.077745 | 3 |
| 413.41 | 4.074178 | 5 |
| 413.91 | 4.070611 | 5 |
| 414.41 | 4.067043 | 5 |
| 414.91 | 4.063476 | 5 |
| 415.41 | 4.059909 | 5 |
| 415.91 | 4.056341 | 5 |
| 416.41 | 4.052774 | 5 |
| 416.91 | 4.049207 | 5 |
| 417.41 | 4.045639 | 5 |
| 417.91 | 4.042072 | 5 |
| 418.41 | 4.038505 | 5 |
| 418.91 | 4.034937 | 5 |
| 419.41 | 4.03137 | 5 |
| 419.91 | 4.027803 | 5 |
| 420.41 | 4.024235 | 5 |
| 420.91 | 4.020668 | 5 |
| 421.41 | 4.0171 | 5 |
| 421.91 | 4.013533 | 5 |
| 422.41 | 4.009966 | 5 |
| 422.91 | 4.006398 | 5 |
| 423.41 | 4.002831 | 5 |
| 423.91 | 3.999264 | 5 |
| 424.41 | 3.995696 | 5 |
| 424.91 | 3.992129 | 5 |
| 425.26 | 3.989632 | 3 |
| 425.41 | 3.988562 | 3 |
| 425.91 | 3.984994 | 3 |
| 426.36 | 3.981784 | 4 |
| 426.41 | 3.981427 | 4 |
| 426.91 | 3.97786 | 4 |
| 427.11 | 3.976433 | 3 |
| 427.41 | 3.974292 | 3 |
| 427.91 | 3.970725 | 3 |
| 428.01 | 3.970011 | 1 |
| 428.41 | 3.967158 | 1 |
| 428.91 | 3.96359 | 1 |
| 429.41 | 3.960023 | 1 |
| 429.91 | 3.956455 | 1 |
| 430.41 | 3.952888 | 1 |
| 430.91 | 3.949321 | 1 |
| 431.41 | 3.945753 | 1 |
| 431.91 | 3.942186 | 1 |
| 432.41 | 3.938619 | 1 |
| 432.76 | 3.936122 | 2 |
| 432.91 | 3.935051 | 2 |
| 433.41 | 3.931484 | 2 |
| 433.91 | 3.927917 | 2 |
| 434.21 | 3.925776 | 4 |
| 434.41 | 3.924349 | 3 |
| 434.86 | 3.921139 | 1 |
| 434.91 | 3.920782 | 1 |
| 435.41 | 3.917215 | 1 |
| 435.91 | 3.913647 | 1 |
| 436.41 | 3.91008 | 1 |
| 436.91 | 3.906513 | 1 |
| 437.41 | 3.902945 | 1 |
| 437.91 | 3.899378 | 1 |
| 438.16 | 3.897594 | 3 |
| 438.41 | 3.895811 | 3 |
| 438.91 | 3.892243 | 3 |
| 439.41 | 3.888676 | 3 |
| 439.91 | 3.885108 | 3 |
| 440.16 | 3.883325 | 5 |
| 440.41 | 3.881541 | 5 |
| 440.91 | 3.877974 | 5 |
| 441.41 | 3.874406 | 5 |
| 441.91 | 3.870839 | 5 |
| 442.41 | 3.867272 | 5 |
| 442.91 | 3.863704 | 5 |
| 443.41 | 3.860137 | 5 |
| 443.91 | 3.85657 | 5 |
| 444.41 | 3.853002 | 5 |
| 444.91 | 3.849435 | 5 |
| 445.41 | 3.845868 | 5 |
| 445.91 | 3.8423 | 5 |
| 446.41 | 3.838733 | 5 |
| 446.91 | 3.835166 | 5 |
| 447.26 | 3.832668 | 3 |
| 447.36 | 3.831955 | 2 |
| 447.41 | 3.831598 | 2 |
| 447.91 | 3.828031 | 2 |
| 448.41 | 3.824463 | 2 |
| 448.91 | 3.820896 | 2 |
| 449.41 | 3.817329 | 5 |
| 449.91 | 3.813761 | 5 |
| 450.41 | 3.810194 | 5 |
| 450.91 | 3.806627 | 5 |
| 451.41 | 3.803059 | 5 |
| 451.91 | 3.799492 | 5 |
| 452.41 | 3.795925 | 5 |
| 452.91 | 3.792357 | 5 |
| 453.41 | 3.78879 | 5 |
| 453.91 | 3.785223 | 5 |
| 454.41 | 3.781655 | 5 |
| 454.91 | 3.778088 | 5 |
| 455.41 | 3.774521 | 5 |
| 455.91 | 3.770953 | 5 |
| 456.41 | 3.767386 | 5 |
| 456.76 | 3.764889 | 4 |
| 456.91 | 3.763818 | 4 |
| 457.41 | 3.760251 | 4 |
| 457.91 | 3.756684 | 4 |
| 458.41 | 3.753116 | 4 |
| 458.66 | 3.751333 | 5 |
| 458.91 | 3.749549 | 5 |
| 459.41 | 3.745982 | 5 |
| 459.91 | 3.742414 | 5 |
| 460.41 | 3.738847 | 5 |
| 460.91 | 3.73528 | 5 |
| 461.26 | 3.732783 | 3 |
| 461.41 | 3.731712 | 3 |
| 461.91 | 3.728145 | 3 |
| 462.36 | 3.724934 | 1 |
| 462.41 | 3.724578 | 1 |
| 462.91 | 3.72101 | 1 |
| 463.41 | 3.717443 | 1 |
| 463.91 | 3.713876 | 1 |
| 464.16 | 3.712092 | 4 |
| 464.41 | 3.710308 | 4 |
| 470.56 | 3.66643 | 5 |
| 470.91 | 3.663933 | 5 |
| 471.41 | 3.660365 | 5 |
| 471.91 | 3.656798 | 5 |
| 472.06 | 3.655728 | 3 |
| 472.41 | 3.653231 | 3 |
| 472.81 | 3.650377 | 1 |
| 472.91 | 3.649663 | 1 |
| 473.41 | 3.646096 | 1 |
| 473.91 | 3.642529 | 1 |
| 474.36 | 3.639318 | 3 |
| 474.41 | 3.638961 | 3 |
| 474.91 | 3.635394 | 3 |
| 475.41 | 3.631826 | 3 |
| 475.91 | 3.628259 | 3 |
| 476.11 | 3.626832 | 2 |
| 476.41 | 3.624692 | 2 |
| 476.91 | 3.621124 | 2 |
| 477.41 | 3.617557 | 2 |
| 477.91 | 3.61399 | 2 |
| 478.41 | 3.610422 | 2 |
| 478.91 | 3.606855 | 2 |
| 479.16 | 3.605071 | 4 |
| 479.41 | 3.603288 | 4 |
| 479.91 | 3.59972 | 4 |
| 479.96 | 3.599364 | 3 |
| 480.41 | 3.596153 | 3 |
| 480.56 | 3.595083 | 2 |
| 480.91 | 3.592586 | 2 |
| 481.41 | 3.589018 | 2 |
| 481.91 | 3.585451 | 2 |
| 482.41 | 3.581884 | 2 |
| 482.91 | 3.578316 | 2 |
| 483.41 | 3.574749 | 2 |
| 483.56 | 3.573679 | 4 |
| 483.91 | 3.571182 | 4 |
| 484.41 | 3.567614 | 4 |
| 484.91 | 3.564047 | 4 |
| 485.41 | 3.560479 | 4 |
| 485.91 | 3.556912 | 4 |
| 485.96 | 3.556555 | 3 |
| 486.41 | 3.553345 | 3 |
| 486.91 | 3.549777 | 3 |
| 487.41 | 3.54621 | 3 |
| 487.91 | 3.542643 | 3 |
| 488.41 | 3.539075 | 3 |
| 488.91 | 3.535508 | 2 |
| 489.41 | 3.531941 | 2 |
| 489.91 | 3.528373 | 2 |
| 490.41 | 3.524806 | 2 |
| 490.86 | 3.521595 | 1 |
| 490.91 | 3.521239 | 1 |
| 491.41 | 3.517671 | 1 |
| 491.91 | 3.514104 | 1 |
| 492.41 | 3.510537 | 1 |
| 492.91 | 3.506969 | 1 |
| 493.41 | 3.503402 | 1 |
| 493.91 | 3.499834 | 1 |
| 494.41 | 3.496267 | 1 |
| 494.91 | 3.4927 | 1 |
| 495.26 | 3.490203 | 2 |
| 495.41 | 3.489132 | 2 |
| 495.91 | 3.485565 | 2 |
| 496.41 | 3.481998 | 2 |
| 496.91 | 3.47843 | 2 |
| 497.41 | 3.474863 | 2 |
| 497.91 | 3.471296 | 2 |
| 498.41 | 3.467728 | 2 |
| 498.91 | 3.464161 | 2 |
| 498.96 | 3.463804 | 3 |
| 499.41 | 3.460594 | 3 |
| 499.91 | 3.457026 | 3 |
| 500.41 | 3.453459 | 3 |
| 500.91 | 3.449892 | 3 |
| 501.41 | 3.446324 | 3 |
| 501.91 | 3.442757 | 3 |
| 502.41 | 3.439189 | 3 |
| 502.91 | 3.435622 | 3 |
| 503.41 | 3.432055 | 3 |
| 503.91 | 3.428487 | 3 |
| 504.41 | 3.42492 | 3 |
| 504.56 | 3.42385 | 2 |
| 504.91 | 3.421353 | 2 |
| 505.31 | 3.418499 | 5 |
| 505.41 | 3.417785 | 5 |
| 505.91 | 3.414218 | 5 |
| 506.41 | 3.410651 | 5 |
| 506.91 | 3.407083 | 5 |
| 507.41 | 3.403516 | 5 |
| 507.91 | 3.399949 | 5 |
| 508.41 | 3.396381 | 5 |
| 508.91 | 3.392814 | 5 |
| 509.41 | 3.389247 | 5 |
| 509.91 | 3.385679 | 5 |
| 510.41 | 3.382112 | 5 |
| 510.51 | 3.381398 | 3 |
| 510.91 | 3.378545 | 3 |
| 511.01 | 3.377831 | 5 |
| 511.41 | 3.374977 | 5 |
| 511.91 | 3.37141 | 5 |
| 512.41 | 3.367842 | 5 |
| 512.91 | 3.364275 | 5 |
| 513.01 | 3.363562 | 4 |
| 513.41 | 3.360708 | 4 |
| 513.66 | 3.358924 | 1 |
| 513.91 | 3.35714 | 1 |
| 514.41 | 3.353573 | 1 |
| 514.91 | 3.350006 | 1 |
| 515.16 | 3.348222 | 4 |
| 515.41 | 3.346438 | 4 |
| 515.91 | 3.342871 | 4 |
| 516.26 | 3.340374 | 3 |
| 516.41 | 3.339304 | 3 |
| 516.91 | 3.335736 | 3 |
| 517.41 | 3.332169 | 3 |
| 517.91 | 3.328602 | 3 |
| 518.41 | 3.325034 | 3 |
| 518.91 | 3.321467 | 3 |
| 519.41 | 3.3179 | 3 |
| 519.91 | 3.314332 | 3 |
| 520.41 | 3.310765 | 3 |
| 520.76 | 3.308268 | 5 |
| 520.91 | 3.307197 | 5 |
| 521.41 | 3.30363 | 5 |
| 521.91 | 3.300063 | 5 |
| 522.41 | 3.296495 | 5 |
| 522.91 | 3.292928 | 5 |
| 523.41 | 3.289361 | 5 |
| 523.91 | 3.285793 | 5 |
| 524.41 | 3.282226 | 5 |
| 524.91 | 3.278659 | 5 |
| 525.41 | 3.275091 | 5 |
| 525.91 | 3.271524 | 5 |
| 526.36 | 3.268313 | 5 |
| 526.41 | 3.267957 | 5 |
| 526.91 | 3.264389 | 5 |
| 527.41 | 3.260822 | 5 |
| 527.91 | 3.257255 | 5 |
| 528.41 | 3.253687 | 5 |
| 528.91 | 3.25012 | 5 |
| 529.41 | 3.246553 | 5 |
| 529.91 | 3.242985 | 5 |
| 530.41 | 3.239418 | 5 |
| 530.91 | 3.23585 | 5 |
| 531.16 | 3.234067 | 3 |
| 531.41 | 3.232283 | 3 |
| 531.91 | 3.228716 | 3 |
| 532.36 | 3.225505 | 5 |
| 532.41 | 3.225148 | 5 |
| 532.91 | 3.221581 | 5 |
| 533.41 | 3.218014 | 5 |
| 533.91 | 3.214446 | 5 |
| 534.41 | 3.210879 | 5 |
| 534.91 | 3.207312 | 5 |
| 535.41 | 3.203744 | 5 |
| 535.91 | 3.200177 | 5 |
| 536.41 | 3.19661 | 5 |
| 536.91 | 3.193042 | 5 |
| 537.41 | 3.189475 | 5 |
| 537.91 | 3.185908 | 5 |
| 538.41 | 3.18234 | 5 |
| 538.91 | 3.178773 | 5 |
| 539.41 | 3.175205 | 5 |
| 539.91 | 3.171638 | 5 |
| 540.41 | 3.168071 | 5 |
| 540.66 | 3.166287 | 3 |
| 540.91 | 3.164503 | 3 |
| 541.41 | 3.160936 | 3 |
| 541.91 | 3.157369 | 3 |
| 542.41 | 3.153801 | 3 |
| 542.66 | 3.152018 | 5 |
| 542.91 | 3.150234 | 5 |
| 543.41 | 3.146667 | 5 |
| 543.91 | 3.143099 | 5 |
| 544.41 | 3.139532 | 5 |
| 544.91 | 3.135965 | 5 |
| 545.41 | 3.132397 | 5 |
| 545.91 | 3.12883 | 5 |
| 546.41 | 3.125263 | 5 |
| 546.91 | 3.121695 | 5 |
| 547.41 | 3.118128 | 5 |
| 547.91 | 3.114561 | 5 |
| 548.41 | 3.110993 | 5 |
| 548.91 | 3.107426 | 5 |
| 549.41 | 3.103858 | 5 |
| 549.91 | 3.100291 | 5 |
| 550.41 | 3.096724 | 5 |
| 550.91 | 3.093156 | 5 |
| 551.41 | 3.089589 | 5 |
| 551.91 | 3.086022 | 5 |
| 552.41 | 3.082454 | 5 |
| 552.91 | 3.078887 | 5 |
| 553.41 | 3.07532 | 5 |
| 553.91 | 3.071752 | 5 |
| 554.41 | 3.068185 | 5 |
| 554.91 | 3.064618 | 5 |
| 555.41 | 3.06105 | 5 |
| 555.91 | 3.057483 | 5 |
| 556.41 | 3.053916 | 5 |
| 556.91 | 3.050348 | 5 |
| 557.41 | 3.046781 | 5 |
| 557.91 | 3.043213 | 5 |
| 558.41 | 3.039646 | 5 |
| 558.91 | 3.036079 | 5 |
| 559.41 | 3.032511 | 5 |
| 559.91 | 3.028944 | 5 |
| 560.41 | 3.025377 | 5 |
| 560.91 | 3.021809 | 5 |
| 561.41 | 3.018242 | 5 |
| 561.91 | 3.014675 | 5 |
| 562.41 | 3.011107 | 5 |
| 562.91 | 3.00754 | 5 |
| 563.41 | 3.003973 | 5 |
| 563.91 | 3.000405 | 5 |
| 564.41 | 2.996838 | 5 |
| 564.91 | 2.993271 | 5 |
| 565.41 | 2.989703 | 5 |
| 565.91 | 2.986136 | 5 |
| 566.41 | 2.982568 | 5 |
| 566.51 | 2.981855 | 4 |
| 566.91 | 2.979001 | 4 |
| 567.41 | 2.975434 | 5 |
| 567.91 | 2.971866 | 5 |
| 568.41 | 2.968299 | 5 |
| 568.91 | 2.964732 | 5 |
| 569.41 | 2.961164 | 5 |
| 569.91 | 2.957597 | 5 |
| 570.41 | 2.95403 | 5 |
| 570.91 | 2.950462 | 5 |
| 571.41 | 2.946895 | 5 |
| 571.91 | 2.943328 | 5 |
| 572.41 | 2.93976 | 5 |
| 572.91 | 2.936193 | 5 |
| 573.41 | 2.932626 | 5 |
| 573.91 | 2.929058 | 5 |
| 574.41 | 2.925491 | 5 |
| 574.91 | 2.921924 | 5 |
| 575.41 | 2.918356 | 5 |
| 575.91 | 2.914789 | 5 |
| 576.41 | 2.911221 | 5 |
| 576.91 | 2.907654 | 5 |
| 577.26 | 2.905157 | 4 |
| 577.41 | 2.904087 | 4 |
| 577.91 | 2.900519 | 4 |
| 578.41 | 2.896952 | 4 |
| 578.91 | 2.893385 | 4 |
| 579.06 | 2.892314 | 3 |
| 579.41 | 2.889817 | 3 |
| 579.91 | 2.88625 | 3 |
| 580.41 | 2.882683 | 3 |
| 580.76 | 2.880186 | 5 |
| 580.91 | 2.879115 | 5 |
| 581.41 | 2.875548 | 5 |
| 581.91 | 2.871981 | 5 |
| 582.41 | 2.868413 | 5 |
| 582.91 | 2.864846 | 5 |
| 583.41 | 2.861279 | 5 |
| 583.91 | 2.857711 | 5 |
| 584.41 | 2.854144 | 5 |
| 584.91 | 2.850576 | 5 |
| 585.31 | 2.847723 | 3 |
| 585.41 | 2.847009 | 3 |
| 585.91 | 2.843442 | 3 |
| 586.41 | 2.839874 | 3 |
| 586.76 | 2.837377 | 4 |
| 586.91 | 2.836307 | 4 |
| 587.41 | 2.83274 | 4 |
| 587.91 | 2.829172 | 4 |
| 588.01 | 2.828459 | 3 |
| 588.41 | 2.825605 | 3 |
| 588.91 | 2.822038 | 3 |
| 589.41 | 2.81847 | 3 |
| 589.81 | 2.815616 | 4 |
| 589.91 | 2.814903 | 4 |
| 590.41 | 2.811336 | 4 |
| 590.91 | 2.807768 | 4 |
| 591.21 | 2.805628 | 3 |
| 591.41 | 2.804201 | 3 |
| 591.91 | 2.800634 | 3 |
| 592.31 | 2.79778 | 5 |
| 592.41 | 2.797066 | 5 |
| 592.91 | 2.793499 | 5 |
| 593.41 | 2.789932 | 5 |
| 593.91 | 2.786364 | 5 |
| 594.31 | 2.78351 | 4 |
| 594.41 | 2.782797 | 4 |
| 594.91 | 2.779229 | 4 |
| 595.41 | 2.775662 | 4 |
| 595.91 | 2.772095 | 5 |
| 596.41 | 2.768527 | 5 |
| 596.91 | 2.76496 | 5 |
| 597.41 | 2.761393 | 5 |
| 597.91 | 2.757825 | 5 |
| 598.41 | 2.754258 | 5 |
| 598.91 | 2.750691 | 5 |
| 599.41 | 2.747123 | 5 |
| 599.91 | 2.743556 | 5 |
| 600.41 | 2.739989 | 5 |
| 600.91 | 2.736421 | 5 |
| 601.41 | 2.732854 | 5 |
| 601.91 | 2.729287 | 5 |
| 602.21 | 2.727146 | 4 |
| 602.41 | 2.725719 | 4 |
| 602.91 | 2.722152 | 4 |
| 603.21 | 2.720011 | 5 |
| 603.41 | 2.718584 | 5 |
| 603.91 | 2.715017 | 5 |
| 604.41 | 2.71145 | 5 |
| 604.91 | 2.707882 | 5 |
| 605.41 | 2.704315 | 5 |
| 605.91 | 2.700748 | 5 |
| 606.41 | 2.69718 | 5 |
| 606.71 | 2.69504 | 1 |
| 606.91 | 2.693613 | 1 |
| 607.41 | 2.690046 | 1 |
| 607.91 | 2.686478 | 1 |
| 608.41 | 2.682911 | 1 |
| 608.91 | 2.679344 | 1 |
| 609.41 | 2.675776 | 1 |
| 609.91 | 2.672209 | 1 |
| 610.41 | 2.668642 | 1 |
| 610.91 | 2.665074 | 1 |
| 611.41 | 2.661507 | 1 |
| 611.91 | 2.657939 | 1 |
| 612.41 | 2.654372 | 1 |
| 612.71 | 2.652232 | 4 |
| 612.91 | 2.650805 | 4 |
| 613.41 | 2.647237 | 4 |
| 613.91 | 2.64367 | 4 |
| 614.41 | 2.640103 | 4 |
| 614.46 | 2.639746 | 5 |
| 614.91 | 2.636535 | 5 |
| 615.41 | 2.632968 | 5 |
| 615.91 | 2.629401 | 5 |
| 616.41 | 2.625833 | 5 |
| 616.91 | 2.622266 | 5 |
| 617.41 | 2.618699 | 5 |
| 617.91 | 2.615131 | 5 |
| 618.41 | 2.611564 | 5 |
| 618.91 | 2.607997 | 5 |
| 619.41 | 2.604429 | 5 |
| 619.91 | 2.600862 | 5 |
| 620.41 | 2.597295 | 5 |
| 620.91 | 2.593727 | 5 |
| 621.41 | 2.59016 | 5 |
| 621.91 | 2.586592 | 5 |
| 622.41 | 2.583025 | 5 |
| 622.71 | 2.580885 | 5 |
